# Supplementary material for: Phytochemical Screening and Bioactivities of Cactaceae Family Members Endemic to Mexico
Source: MDPI journal article supplement (doi:10.3390/plants11212856), 2022-10-26
Supplement: s1 [file s1]

---

## SUPPLEMENTARY INFORMATION

### **Phytochemical Screening and Bioactivities of Cactaceae Family Members Endemic to Mexico**

Clara Angélica Rodríguez-Mendoza<sup>1</sup>, Rubí Esmeralda González Campos<sup>1</sup>, Ana Cecilia Lorenzo-Leal<sup>2</sup>, Elizabeth Bautista Rodríguez<sup>1</sup>, Genaro Alberto Paredes Juárez<sup>3</sup>, Elie Girgis El Kassis<sup>1</sup>, Luis Ricardo Hernández<sup>1</sup>, Zaida Nelly Juárez<sup>5,\*</sup> and Horacio Bach<sup>2,\*</sup>

<sup>1</sup>Biotechnology Faculty, Deanship of Biological Sciences, Universidad Popular Autónoma del Estado de Puebla, 21 Sur 1103 Barrio Santiago, 72410, Puebla, Mexico

<sup>2</sup>Division of Infectious Disease, Department of Medicine, University of British Columbia, 2660 Oak Street, Vancouver, BC V6H 3Z6, Canada

<sup>3</sup>Department of degree in Medical Surgeon. Academic Secretary. Universidad de la Salud Puebla. Reforma 722, Puebla, Puebla, 72000, Mexico

<sup>4</sup>Department of Chemical Biological Sciences, Universidad de las Américas Puebla, Ex Hacienda Sta. Catarina Mártir S/N, San Andrés Cholula, 72810, Mexico

<sup>5</sup>Chemistry Area, Deanship of Biological Sciences, Universidad Popular Autónoma del Estado de Puebla, 21 Sur 1103 Barrio Santiago, 72410, Puebla, Puebla, Mexico

Correspondence: zaidanelly.juarez@upaep.mx (Z.J.); hbach@mail.ubc.ca (H.B.)

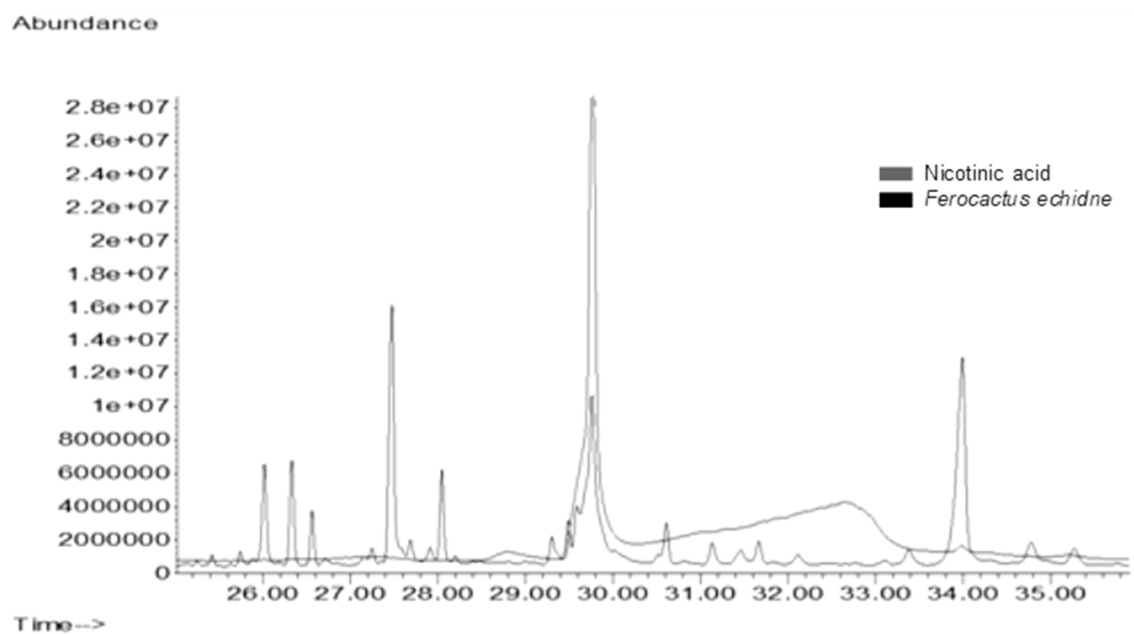

**Figure S1.** Comparison of the chromatograms of the ethanol extract of *Ferocactus echidne* and niacin.

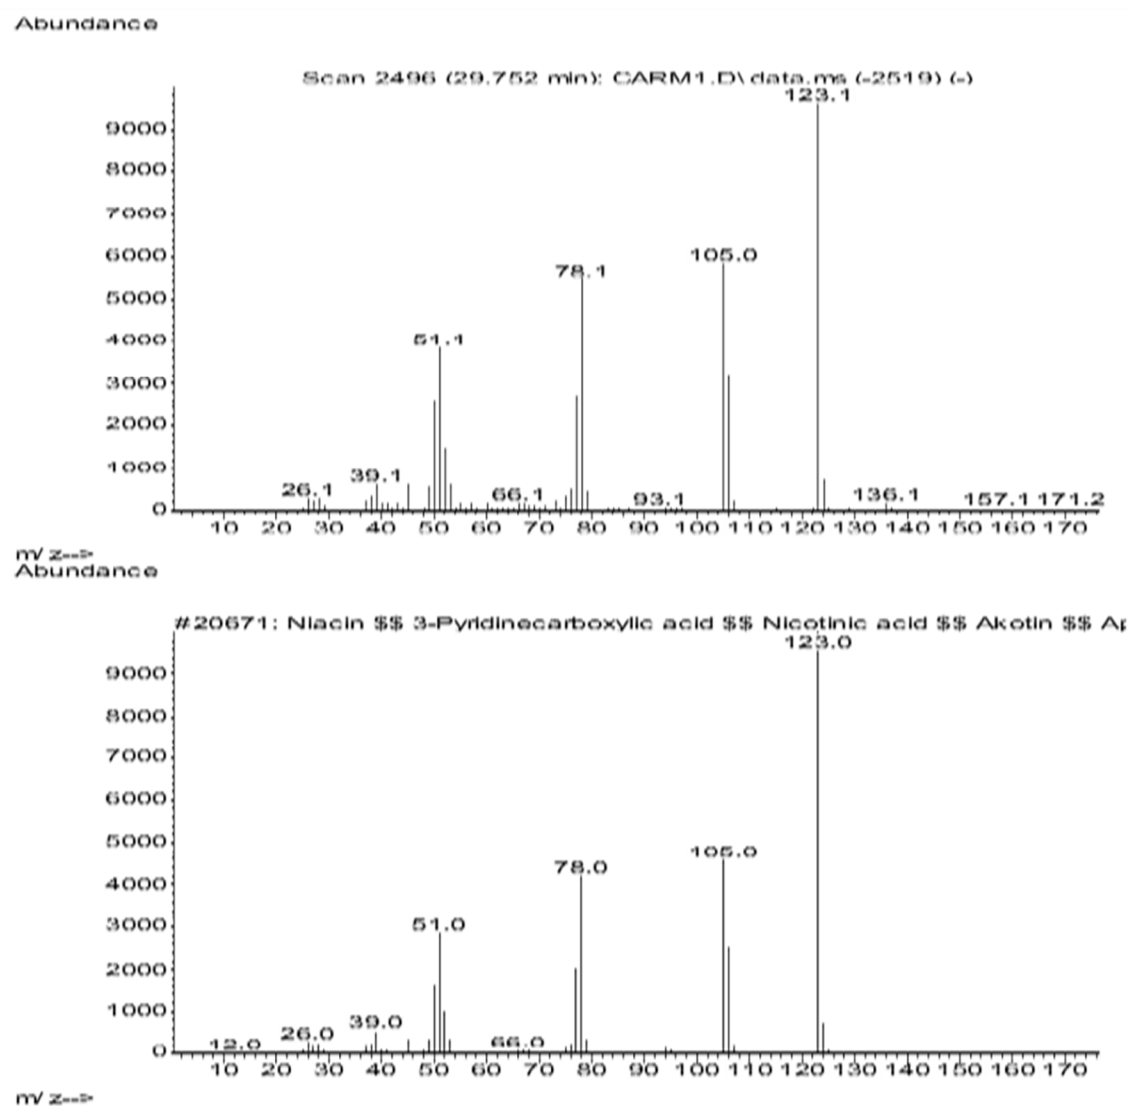

**Figure S2.** Comparison of mass spectra of the ethanol extract of *Ferocactus echidne* sample (up) with the W10N11 database (bottom), showing that it corresponds to niacin.

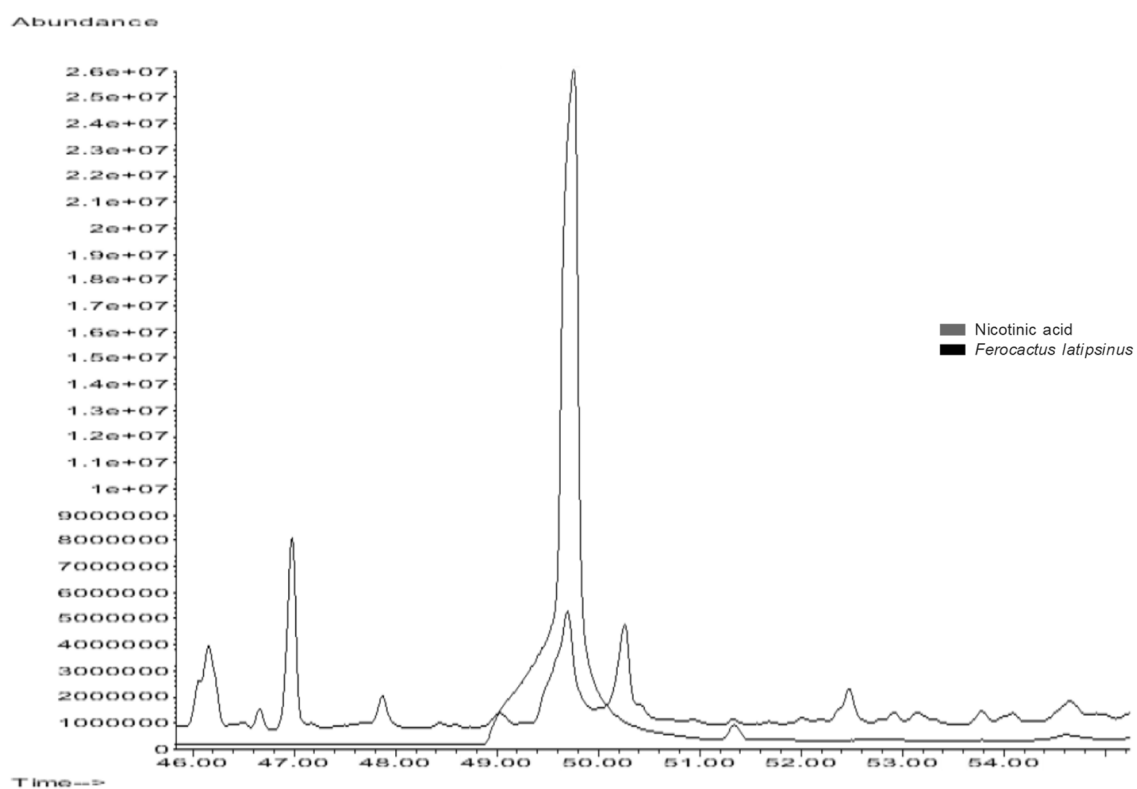

**Figure S3.** Comparison of the chromatograms of the ethanolic extract of *Ferocactus latispinus* and niacin.

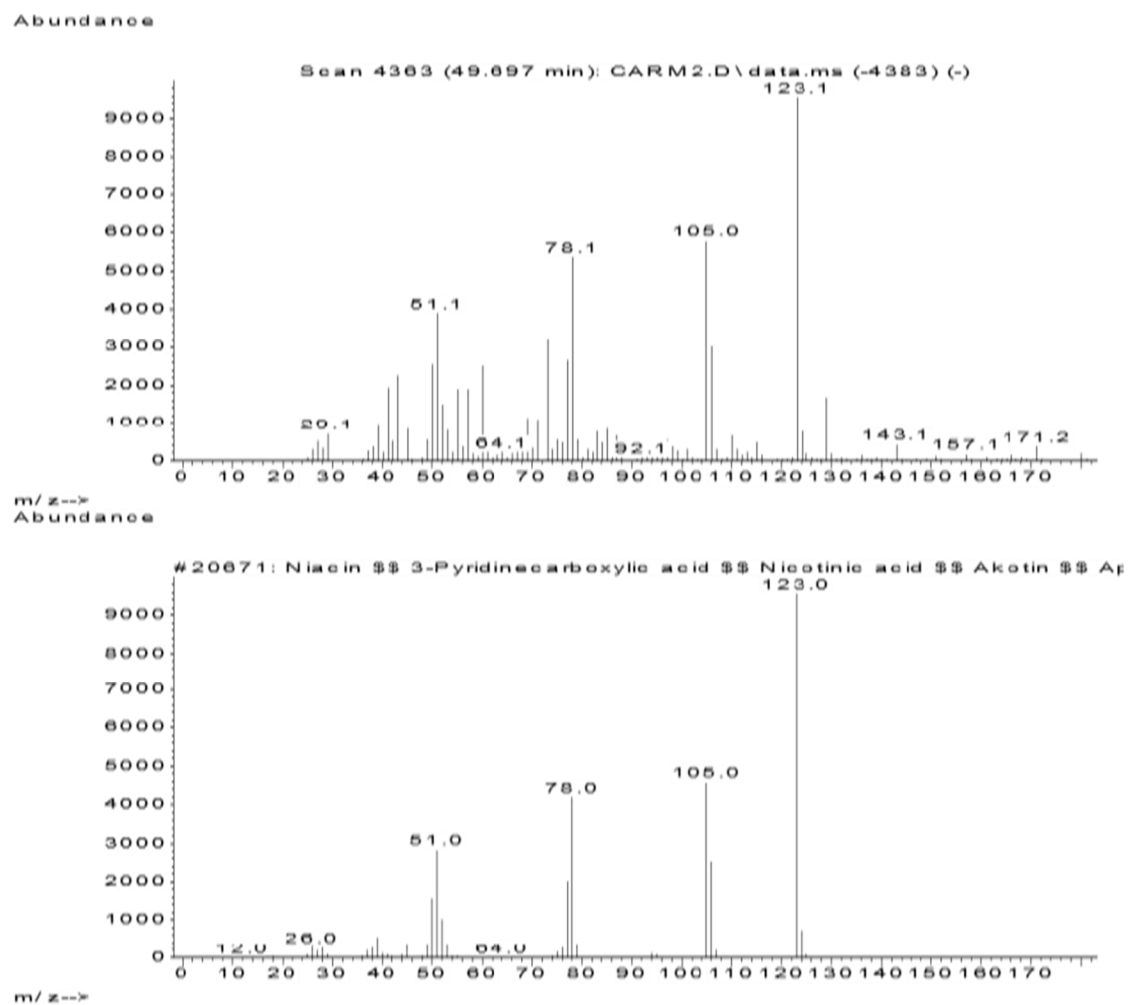

**Figure S4.** Comparison of mass spectra of the ethanolic extract of *Ferocactus latispinus* sample (top) with the W10N11 database (bottom), showing that it corresponds to niacin.

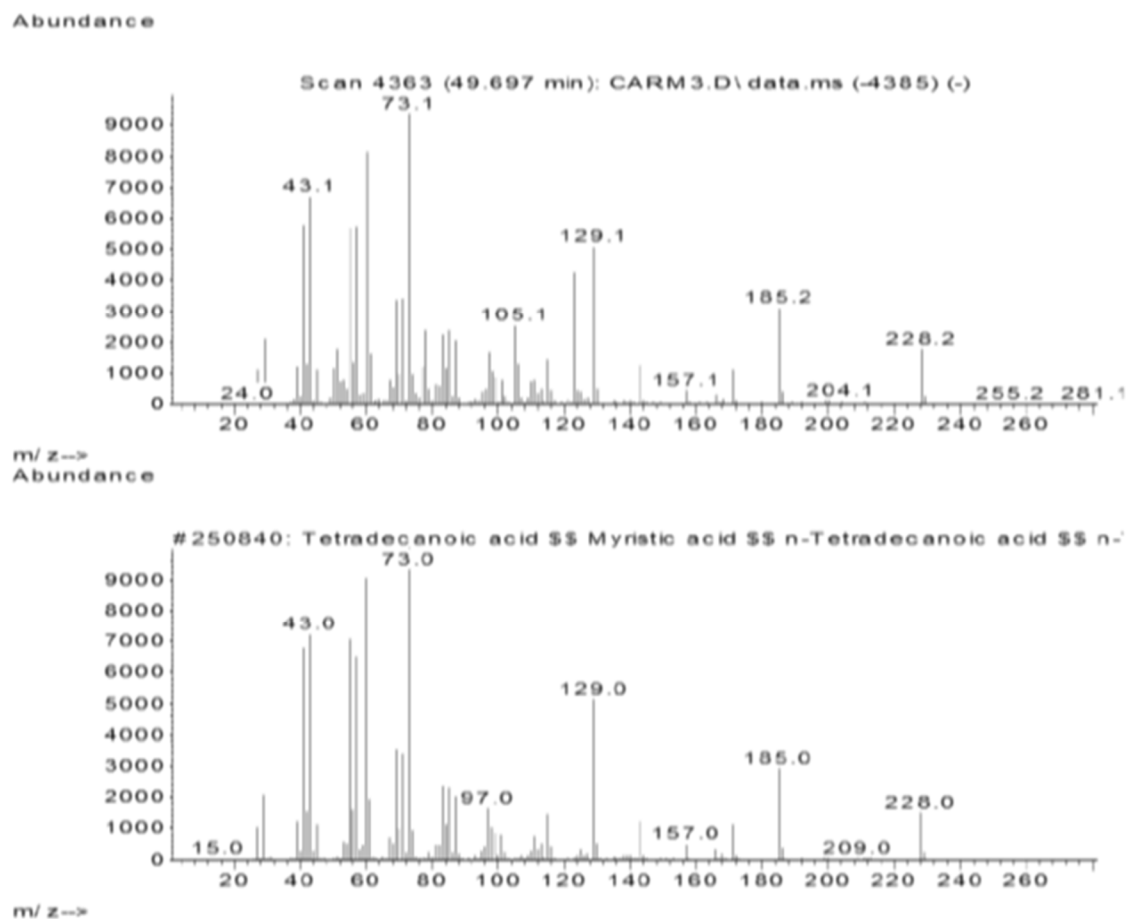

**Figure S5.** Comparison of the compound's mass spectra detected at 49.7 min of the *Mammillaria geminisipina* sample (top) with the W10N11 database (bottom), showing that it corresponds to myristic acid.
